# Supplementary material for: INO80C Remodeler Maintains Genomic Stability by Preventing Promiscuous Transcription at Replication Origins
Source: PubMed Central journal article supplement — Cell Rep. Author manuscript; Available in PMC 2020 Oct 7. (PMC7540730; doi:10.1016/j.celrep.2020.108106), 2020-09-08
Supplement: NIHMS1627873-supplement-mmc1.pdf [file NIHMS1627873-supplement-mmc1.pdf]

**Cell Reports, Volume 32**

**Supplemental Information**

**INO80C Remodeler Maintains Genomic Stability  
by Preventing Promiscuous Transcription  
at Replication Origins**

**Salih Topal, Christopher Van, Yong Xue, Michael F. Carey, and Craig L. Peterson**

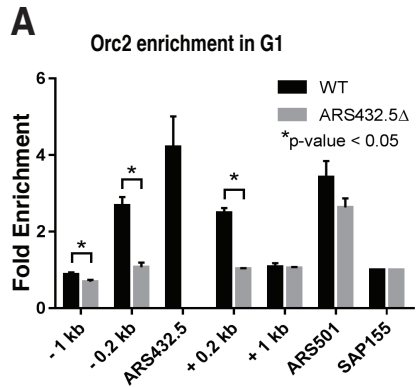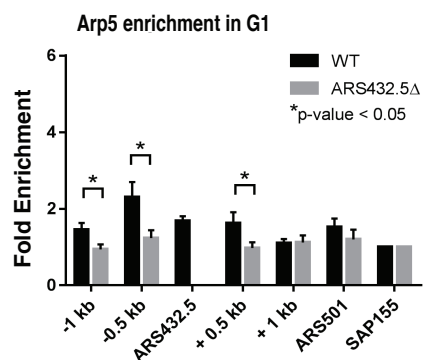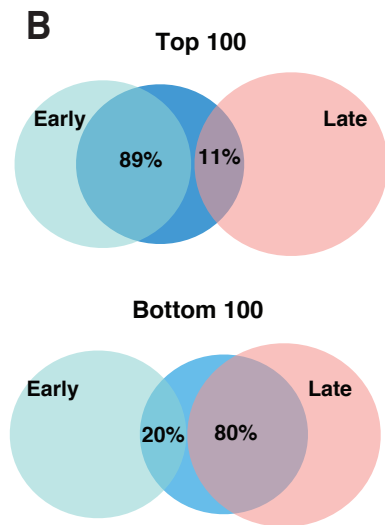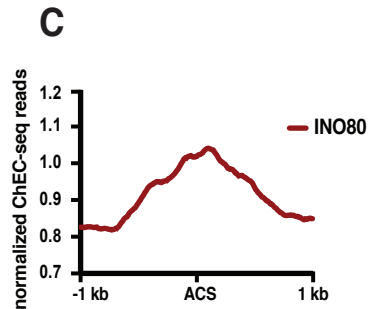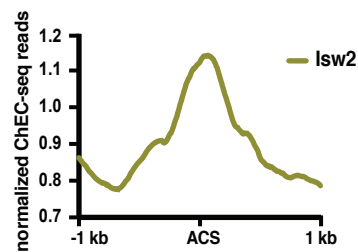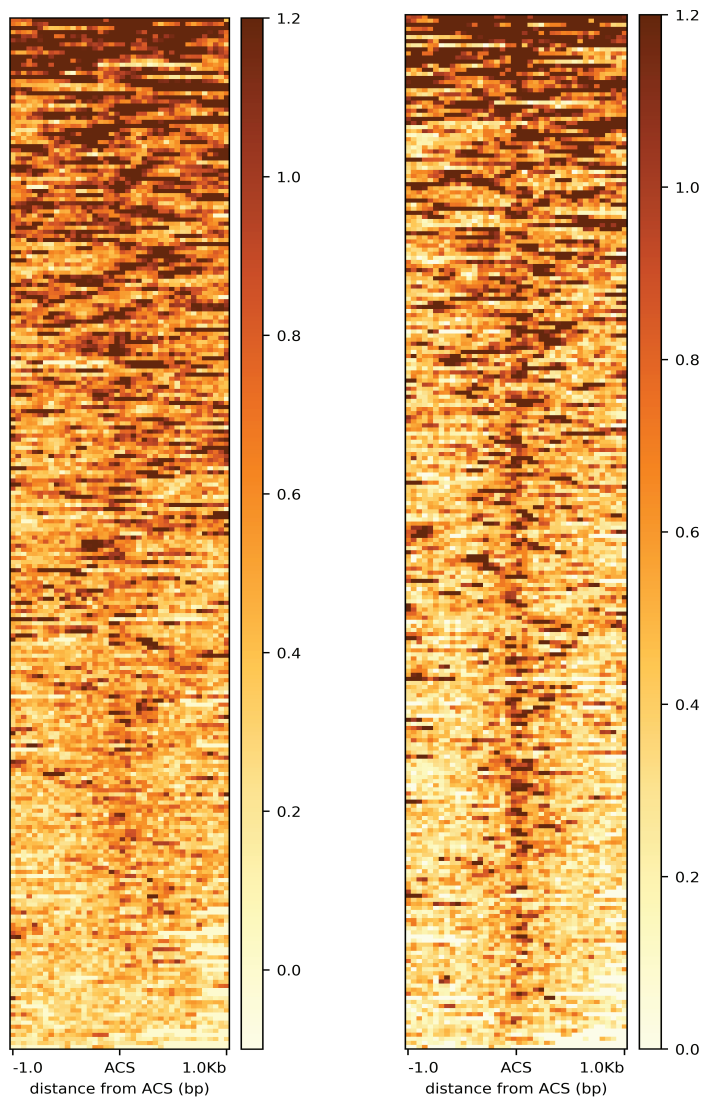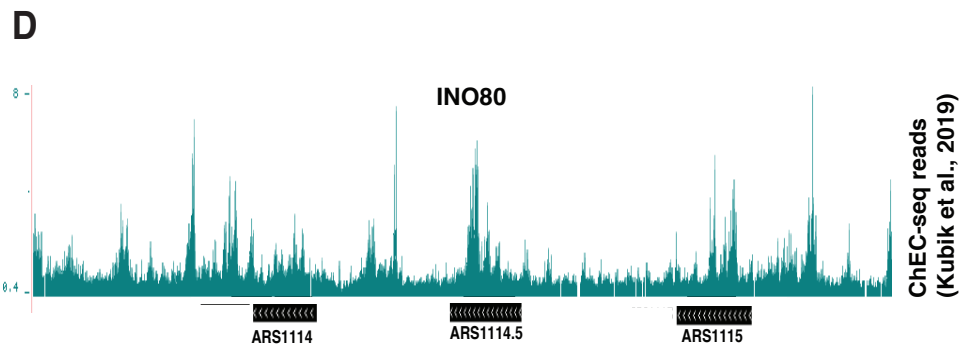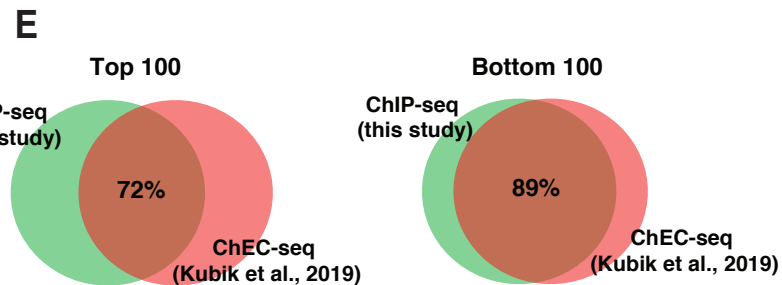

**Figure S1, related to Figure 1. (A)** Fold enrichment levels for Orc2 (upper panel) or Arp5 (lower panel) at SAP155 (a control gene), ARS501 (a late firing origin), ARS432.5 (an early firing origin), 0.2 kb and 1 kb upstream and downstream of ARS432.5 in wild type or ARS432.5 $\Delta$  by ChIP-qPCR. **(B)** Venn diagrams showing correlations of early- or late-firing origins with Top 100 origins (upper panel) and with Bottom 100 origins (lower panel). **(C)** Heatmaps showing  $\log_2$  mean intensity values for all yeast origins (n=253) for Ino80 (left) and Isw2 (right) by ChEC-seq (Kubik et al., 2019). The moving averages of  $\log_2$  Ino80 and Isw2 enrichments were plotted by the distance from ACS (flanking a region of 1 kb upstream and downstream of ACS). Plots above the heatmaps show normalized ChEC-seq reads over ACS (flanking a region of 1 kb upstream and downstream of ACS) for Ino80 (left) and Isw2 (right) enrichments. **(D)** Representative genome browser view for normalized Ino80 enrichment signals by ChEC-seq for a highlighted region in yeast Chr XI for the replication origins ARS1114, ARS1114.5, and ARS1115. **(E)** Venn diagrams showing correlations between ChIP-seq (this study) and ChEC-seq (Kubik et al., 2019) for Top 100 (left panel) or Bottom 100 (right panel) for Ino80 enrichment.

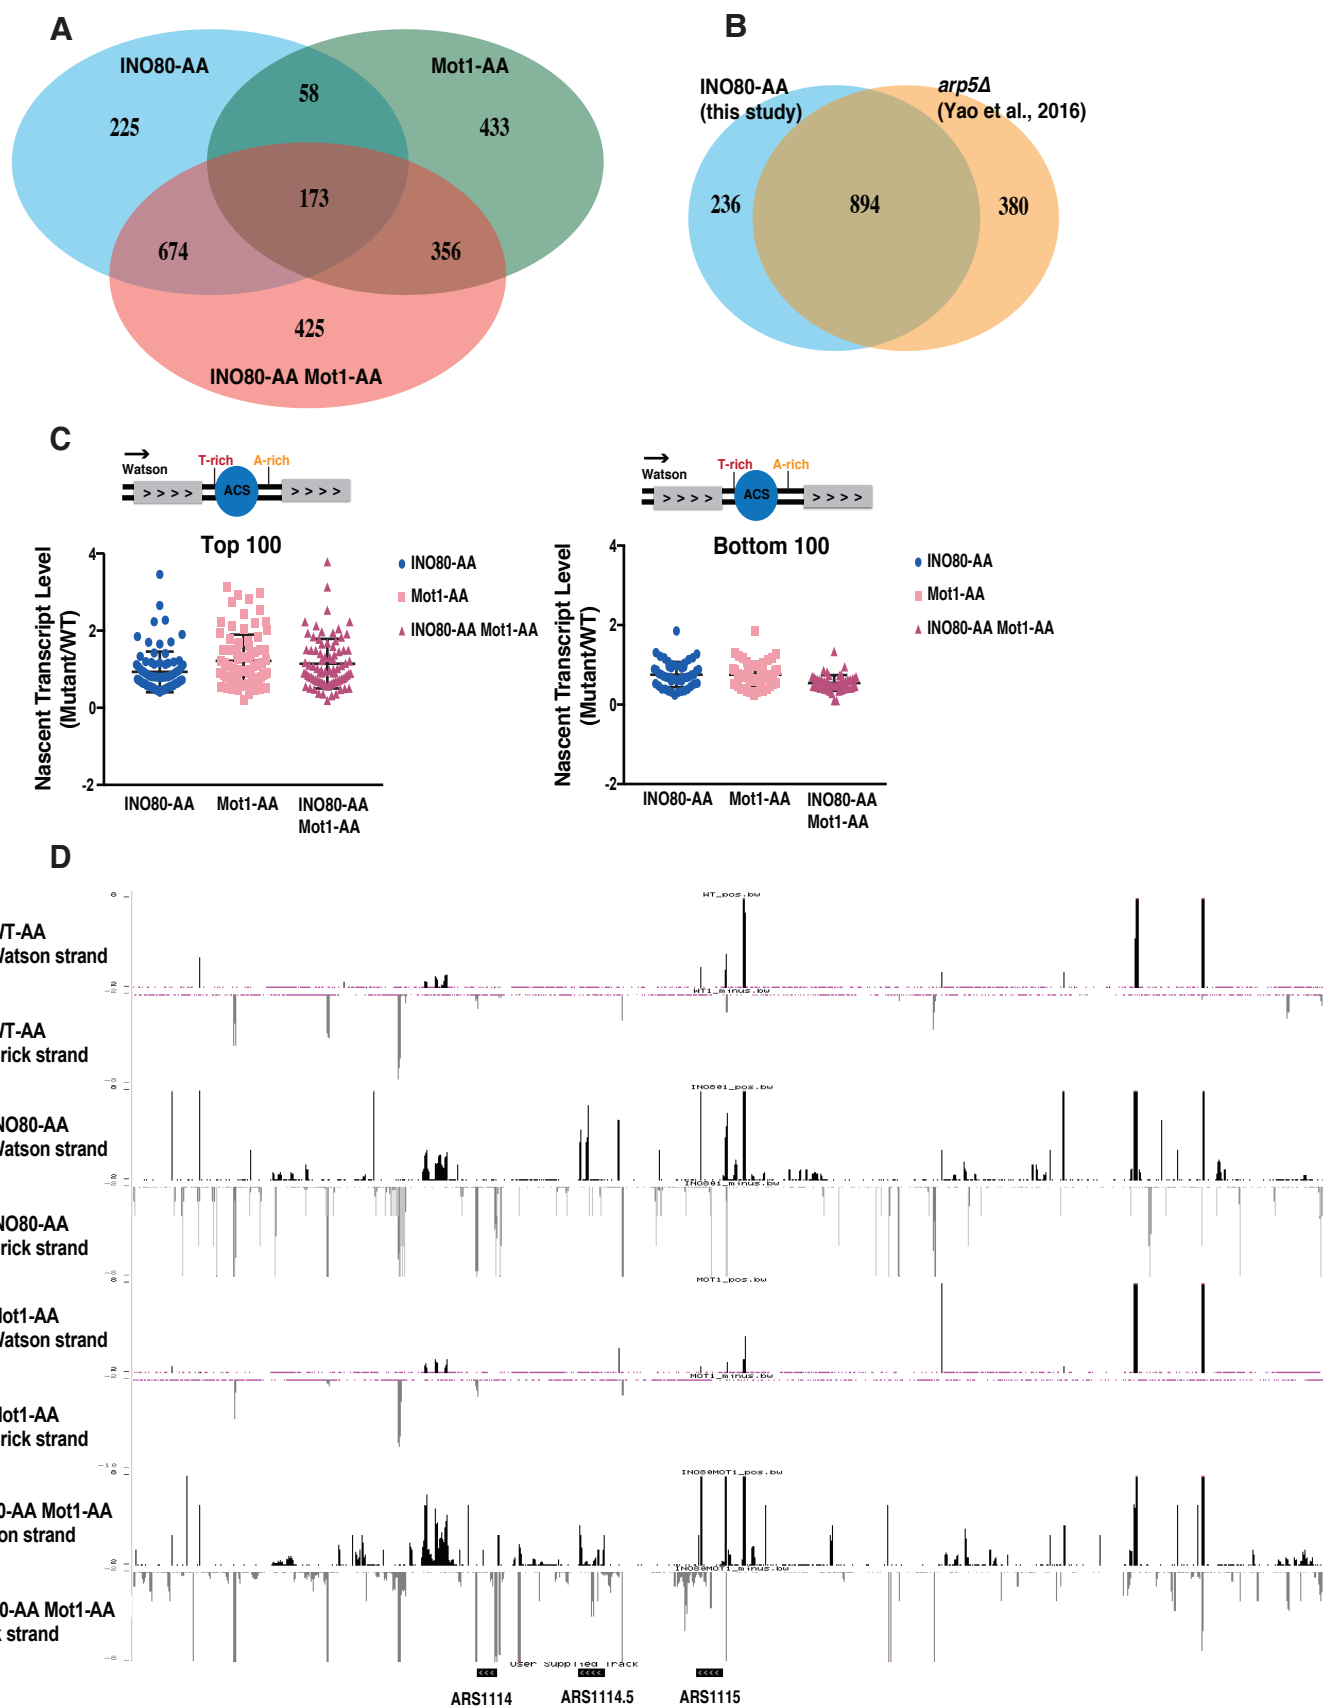



**Figure S2, related to Figures 2 and 3.** (A) Venn diagram showing correlation in numbers of down-regulated genes ( $\geq 1.5$  FC,  $FDR \leq 0.05$ ) between INO80-AA, Mot1-AA, and INO80-AA Mot1-AA. (B) Venn diagram showing correlation in numbers of genes ( $\geq 1.5$  FC,  $FDR \leq 0.05$ ) for INO80-AA between this study and a previously published study (Yao et al., 2016). (C) A scatter dot plot showing nascent transcription levels (mutant/wildtype) of genes flanking replication origins for rapamycin-treated INO80-AA (blue), Mot1-AA (pink), and INO80-AA Mot1-AA (fuchsia) for Top 100 (left graph) or Bottom 100 (right graph). The schematics above each graph indicate the orientation of ACS. Significance and p-values were calculated by using Mann-Whitney U-test. (D) Representative genome browser views for NET-seq for both strands (Watson strand – upper tracks, Crick strand – lower tracks) for WT-AA, INO80-AA, Mot1-AA, and INO80-AA Mot1-AA for a highlighted region in yeast Chr XI for the replication origins ARS1114, ARS1114.5, and ARS1115. (E). Frequency scores for TATA-box (the canonical TATAWAWR motif with a threshold of  $p < 0.001$ ) over all yeast origins (flanking a region of 200 bp upstream and downstream of ACS).

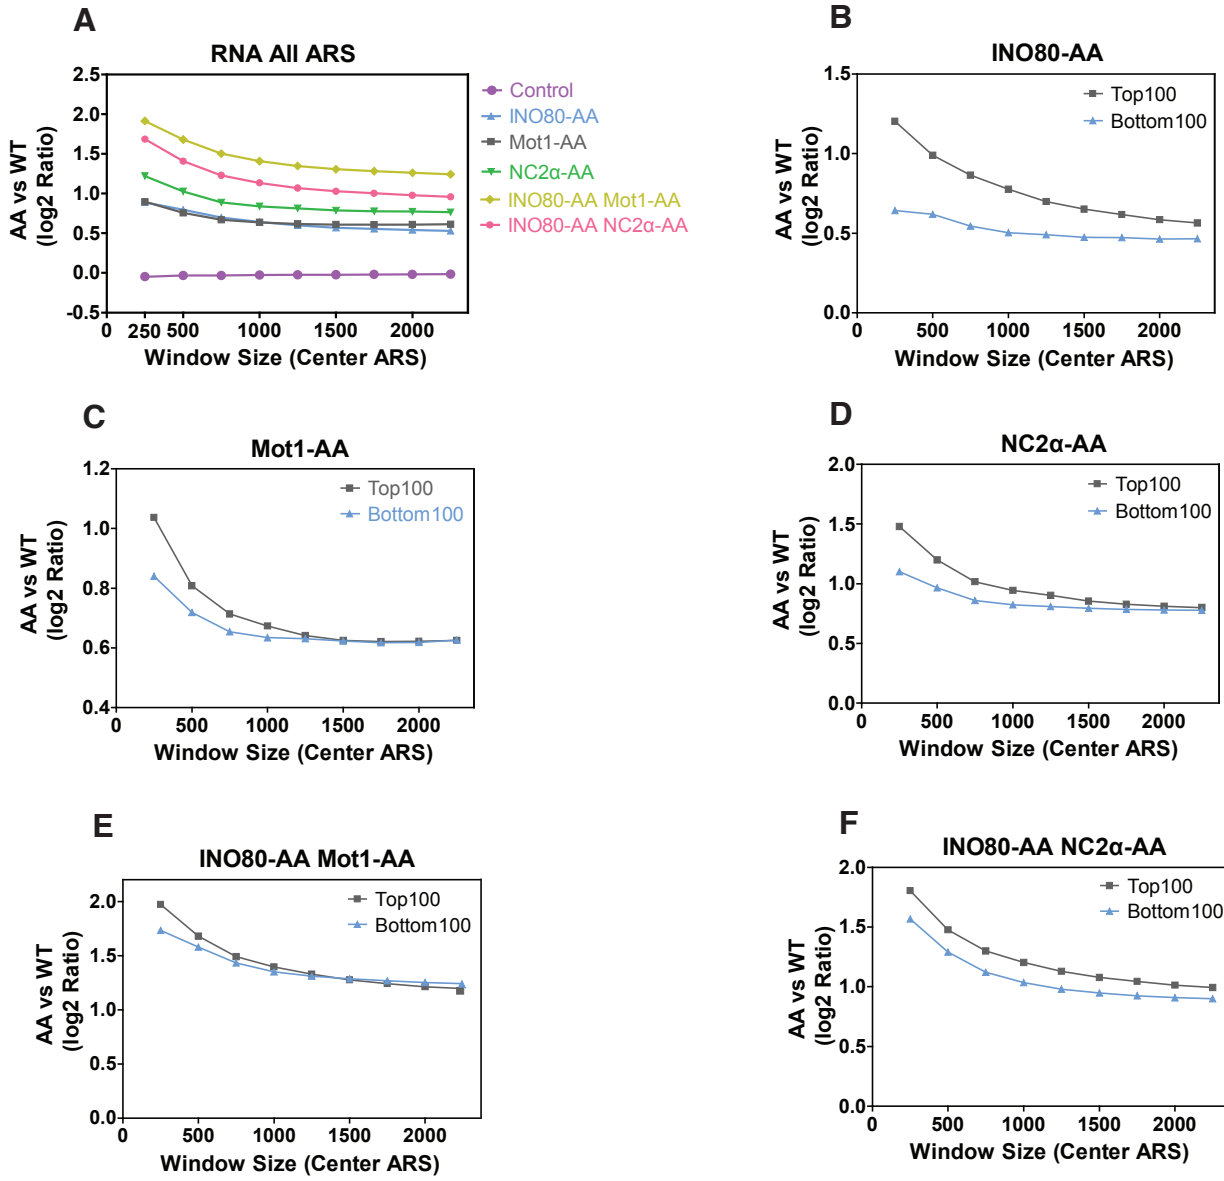

**Figure S3, related to Figures 2 and 3.** RNA-seq analyses. **(A-F)** Plots showing  $\log_2$  ratio values for an average of two biological replicates ( $n=2$ ) for mutant versus WT for INO80-AA, Mot1-AA, NC2 $\alpha$ -AA, INO80-AA Mot1-AA and INO80-AA NC2 $\alpha$ -AA over all yeast origins in **(A)**, for INO80-AA over Top 100 and Bottom 100 origins in **(B)**, for Mot1-AA over Top 100 and Bottom 100 origins in **(C)**, for NC2 $\alpha$ -AA over Top 100 and Bottom 100 origins in **(D)**, for INO80-AA Mot1-AA over Top 100 and Bottom 100 origins in **(E)**, and for INO80-AA NC2 $\alpha$ -AA over Top 100 and Bottom 100 origins in **(F)**. Window size indicates the covered region centered at ARS elements. Control is MJE7 (Rapamycin versus DMSO).

A

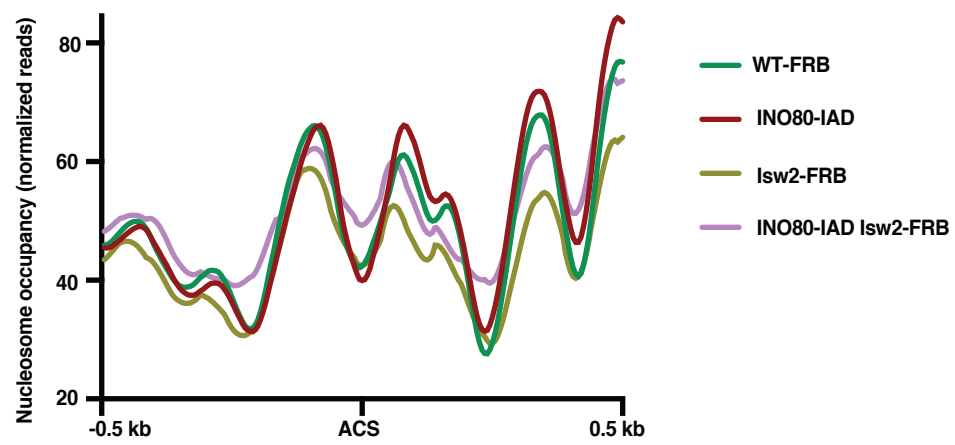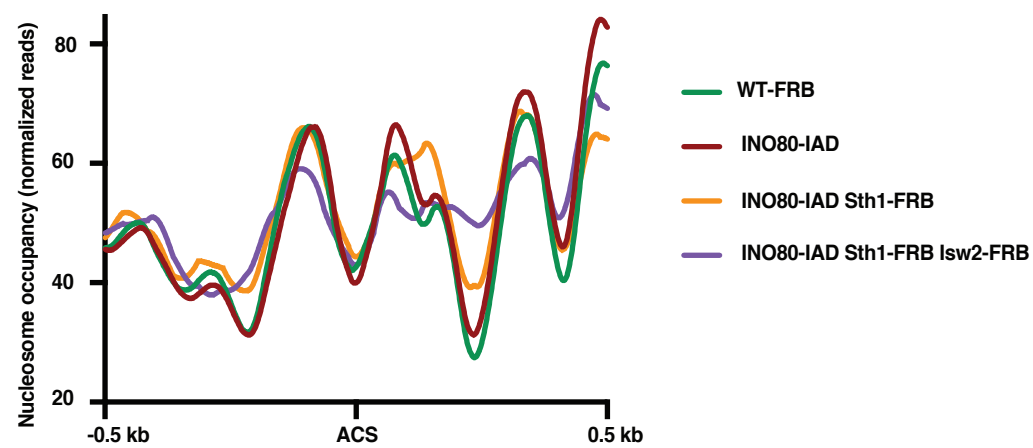

**Figure S4: Nucleosome occupancy is disrupted around yeast origins after depletion of Ino80, related to Figure 3.** (A) Plots of nucleosome occupancies shown for WT-FRB, INO80-IAD, Isw2-FRB, INO80-IAD Isw2-FRB (upper panel) and for (B) WT-FRB, INO80-IAD, INO80-IAD Sth1-FRB, INO80-IAD Sth1-FRB Isw2-FRB (lower panel) for all yeast origins (flanking a region of 0.5 kb upstream and downstream of ACS) by MNase-seq (Kubik et al., 2019).

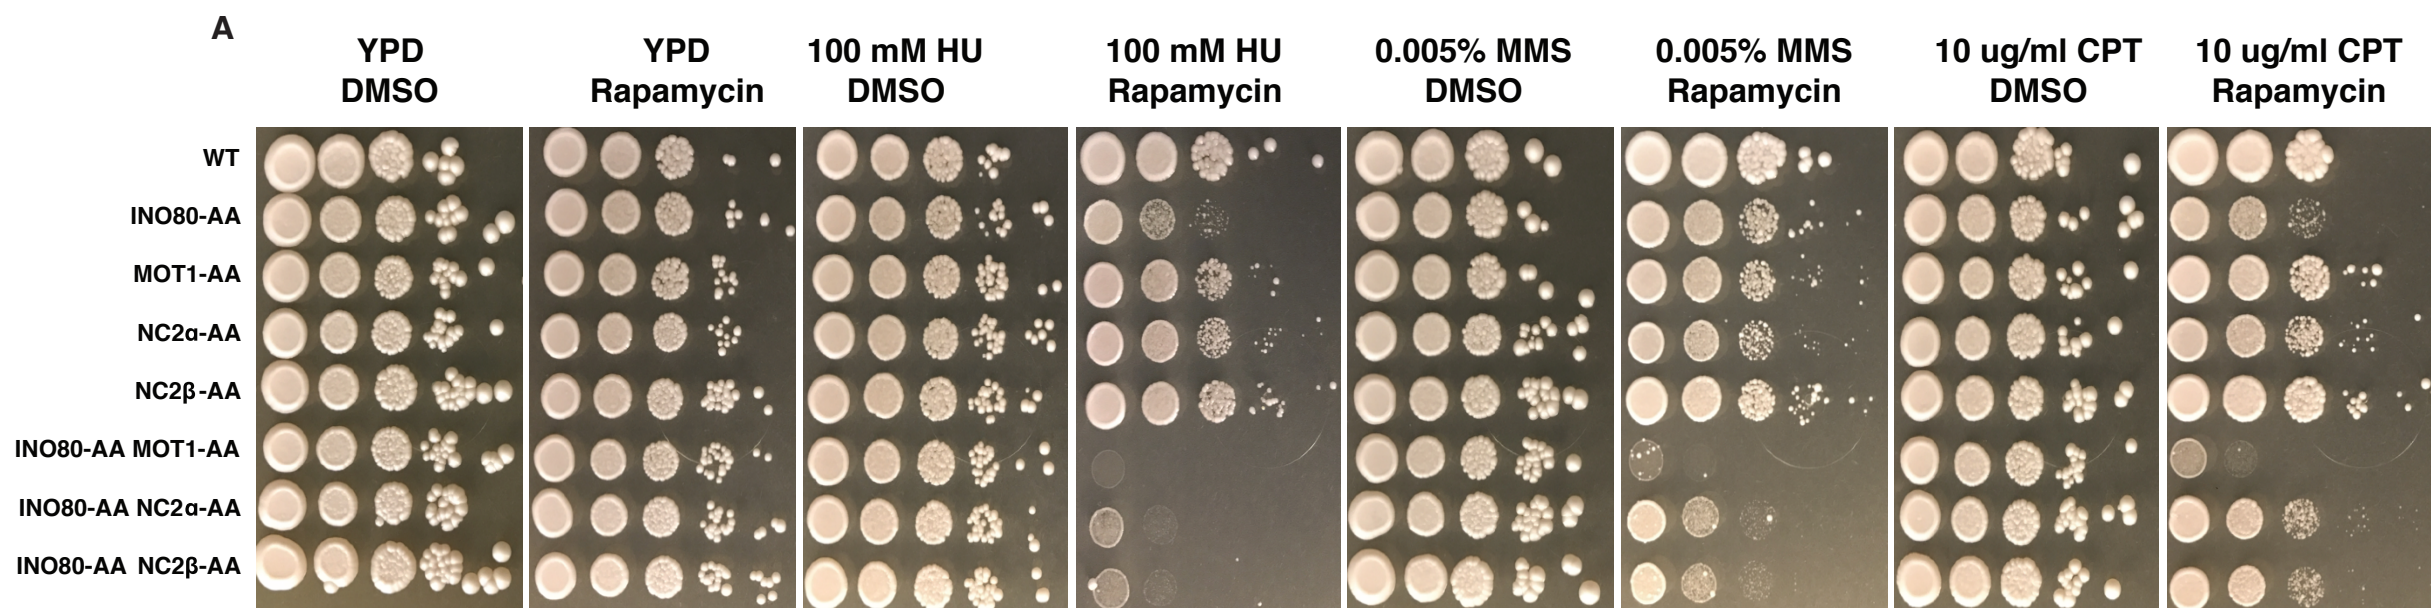

**Figure S5: INO80C, Mot1, and NC2 contribute to genome stability, related to Figure 4. (A)** Wild type and mutant strains were spotted (1/10 dilutions) on YPD media containing either DMSO or 8  $\mu\text{g/ml}$  rapamycin in the presence or absence of 0.1M HU, 0.005% MMS, or 10  $\mu\text{g/ml}$  CPT, then grown for 3 days at 30°C.
